# Supplementary material
Source: PubMed Central journal article supplement (PMC5565794)
Supplement: NIHMS886528-supplement.pdf [file NIHMS886528-supplement.pdf]

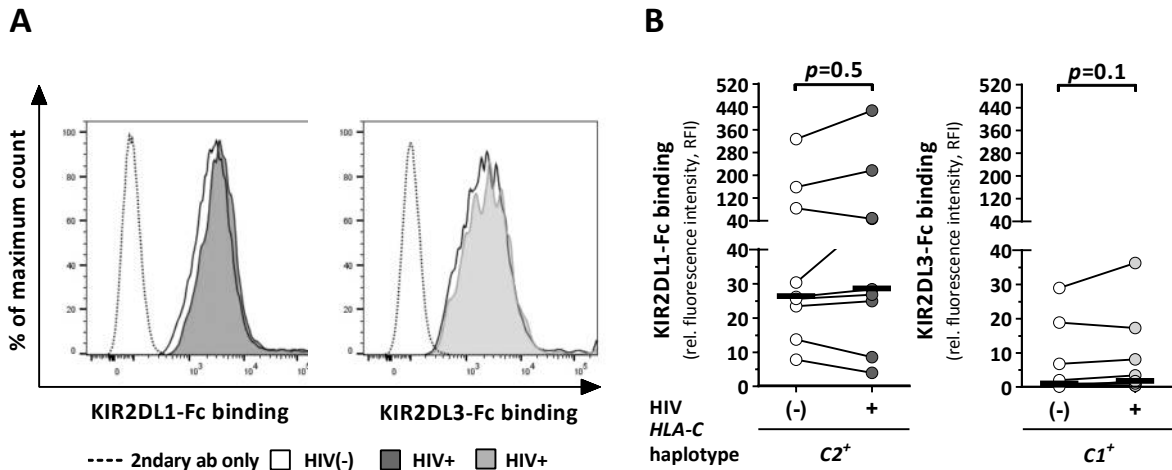

**Figure S1. *In vitro* infection with NL4-3 does not alter KIR2DL binding to infected CD4<sup>+</sup> T cells. Related to Figure 2.** (A) Representative histograms of KIR2DL1 (left panel) and KIR2DL3 binding (right panel) to uninfected CD4<sup>+</sup> T cells and cells infected with NL4-3 measured by flow cytometry. (B) Scatter plots display KIR2DL1 (left panel) and KIR2DL3 binding (right panel) to uninfected CD4<sup>+</sup> T cells and cells infected with NL4-3. Uninfected cells are displayed as clear circles; infected cells are either displayed as dark grey circles (KIR2DL1-Fc) or light grey circles (KIR2DL3-Fc). KIR binding is displayed only for donors expressing the cognate HLA-C ligand ( $C2^+$ : n=9;  $C1^+$ : n=9) and as relative median fluorescence intensity (RFI= [MFI (KIR-Fc+ $\alpha$ IgG-PE)/MFI ( $\alpha$ IgG-PE alone)]-1). Black bars represent the median. Statistical analysis was performed using Wilcoxon matched-pairs signed rank test.

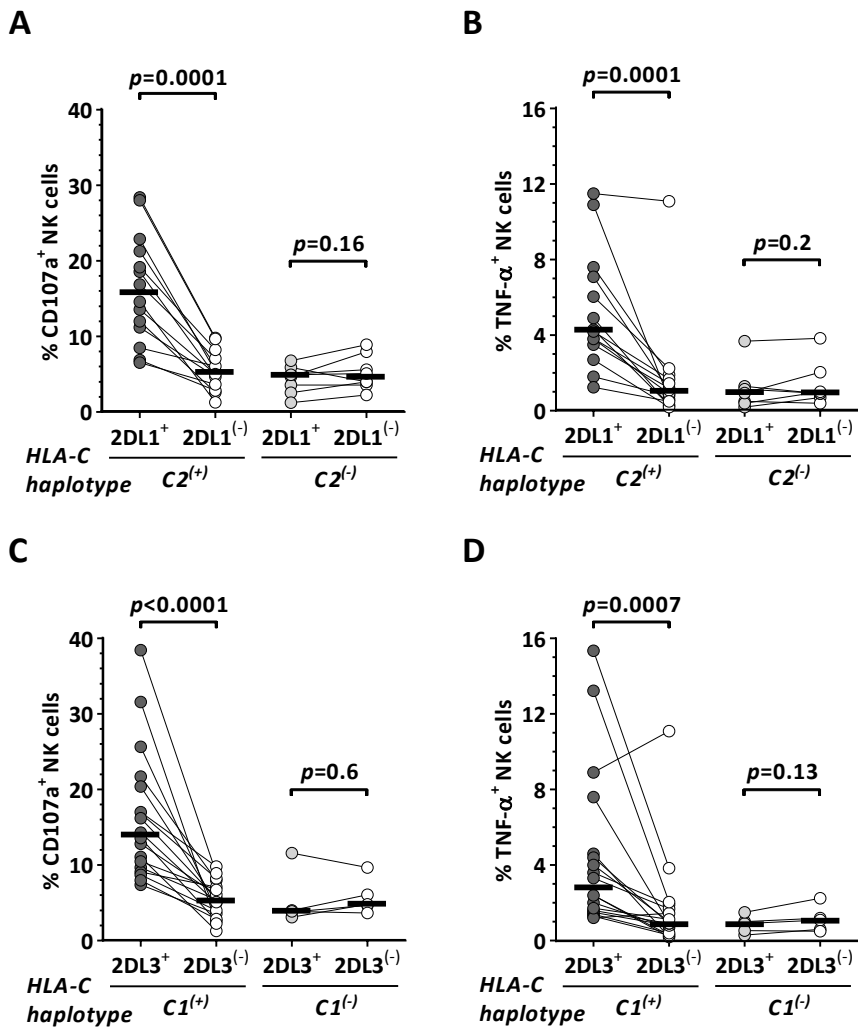

**Figure S2. Licensing of KIR2DL<sup>+</sup> NK cells. Related Figure 3.**

The figure shows the ability of HLA-C-licensed and un-licensed NK cells to respond to the MHC-class I devoid target cell line 721.221. Assessment of HLA-C-mediated licensing of NK cells was determined by frequency of CD107a expression (A/C) and production of TNF- $\alpha$  (B/D) using flow cytometry (n=23). Scatter plots display the frequency of CD107a<sup>+</sup> and TNF- $\alpha$ -producing cells among KIR2DL1<sup>+</sup> and KIR2DL1<sup>(-)</sup> (A/B) as well as KIR2DL3<sup>+</sup> and KIR2DL3<sup>(-)</sup> (C/D) stratified by the underlying HLA-C group haplotype. Respective NK-cell subsets were single-positive for the stated KIR2DL receptor additionally excluding NK cells co-expressing KIR3DL1 and/or NKG2A or lack all measured inhibitory receptors. Black bars represent the median. Wilcoxon matched-pairs signed rank test was used for statistical analysis of the data.

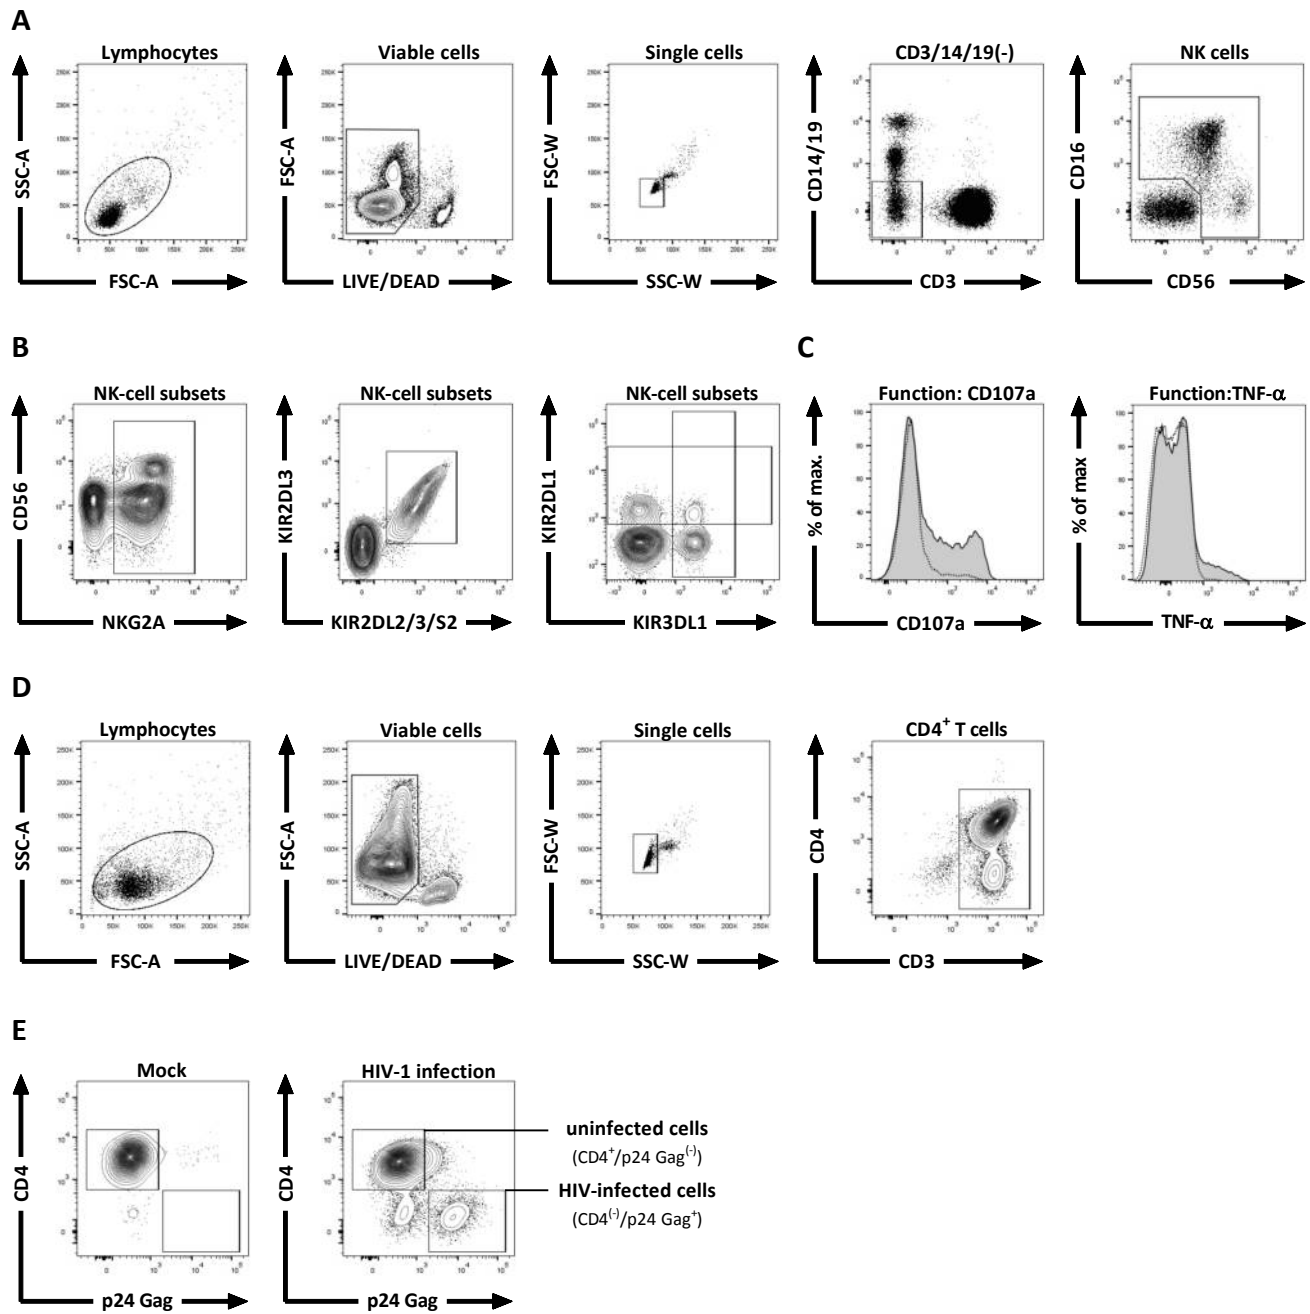

**Figure S3. Gating strategies of flow cytometric analyses. Related to Figures 1-4.**

Representative dot plots displaying the gating strategy after flow cytometric acquisition of lymphocytes. **(A)** Gating strategy to identify NK cells: After acquisition of PBMC lymphocytes were defined by forward (FSC-A) and sideward (SSC-A) scatter. Viable cells were identified by LIVE/DEAD blue. Doublets were excluded by forward (FSC-W) and sideward (SSC-W) scatter. Single, viable NK cells were then defined as CD3<sup>+</sup>/CD14<sup>-</sup>/CD19<sup>-</sup> CD16<sup>+</sup> or CD56<sup>+</sup> cells. **(B)** Identification of NK-cell subsets was conducted by using surface markers for NKG2A, KIR2DL1, KIR3DL1, KIR2DL3 and KIR2DL2/3/S2. **(C)** Functional assessment of NK cells was performed using CD107a expression and intracellular detection of TNF- $\alpha$ . Histograms display the fluorescence intensity of the respective marker in NK cells in the absence (tinted line, clear) and presence (grey, solid line) of MHC class I-devoid cell line 721.221. **(D)** For the assessment of HLA class I expression and KIR binding CD4<sup>+</sup> T cells were identified as follows: Enriched viable single CD4<sup>+</sup> T cells were identified by forward (FSC-A) and sideward (SSC-A) scatter, LIVE/DEAD blue, forward (FSC-W) and sideward (SSC-W) and expression of CD3. **(E)** Left panel shows mock-infected CD4<sup>+</sup> T cells as staining control for intracellular detection of p24 Gag. The right panel displays CD4<sup>+</sup> T cells after infection with HIV-1. Uninfected cells were defined as CD4<sup>+</sup> and p24 Gag<sup>(-)</sup> T cells, infected cells were determined based on the downregulation of CD4 and the expression of p24 Gag.

**Table S1. HLA class I genotypes of enrolled subjects. Related to STAR Methods.**

| Subject-ID | HLA-A |       | HLA-B |       | HLA-C |       | Bw4/6 <sup>(+)</sup> <sup>a</sup> | HLA-C haplotype <sup>b</sup> | Experiments performed with <sup>c</sup> |
|------------|-------|-------|-------|-------|-------|-------|-----------------------------------|------------------------------|-----------------------------------------|
|            | A1    | A2    | B1    | B2    | C1    | C2    |                                   |                              |                                         |
| BC150609A  | 02:01 | 03:02 | 13:02 | 44:02 | 05:01 | 06:02 | Bw4                               | 2/2                          | HLA/KIR-Fc/Function                     |
| BC150609B  | 24:02 | 29:02 | 15:01 | 44:02 | 03:03 | 07:04 | Bw4                               | 1/1                          | HLA/KIR-Fc/Function                     |
| BC150609C  | 02:05 | 31:01 | 38:01 | 44:03 | 04:01 | 12:03 | Bw4                               | 1/2                          | HLA/KIR-Fc/Function                     |
| BC150526A  | 02:01 | 26:01 | 13:02 | 38:01 | 06:02 | 12:03 | Bw4                               | 1/2                          | HLA/KIR-Fc/Function                     |
| BC150526B  | 02:24 | 03:01 | 07:02 | 44:02 | 05:01 | 07:02 | Bw4                               | 1/2                          | HLA/KIR-Fc/Function                     |
| BC150526C  | 01:01 | 01:01 | 08:01 | 08:01 | 07:01 | 07:01 | Bw6                               | 1/1                          | HLA/KIR-Fc/Function                     |
| BC150623A  | 03:01 | 11:01 | 14:01 | 14:02 | 08:02 | 08:02 | Bw6                               | 1/1                          | HLA/KIR-Fc/Function                     |
| BC150623B  | 02:01 | 02:01 | 08:01 | 18:01 | 07:01 | 07:01 | Bw6                               | 1/1                          | HLA/KIR-Fc/Function                     |
| BC150623C  | 03:01 | 03:01 | 07:02 | 55:01 | 07:02 | 07:02 | Bw6                               | 1/1                          | HLA/KIR-Fc/Function                     |
| BC160726A  | 01:01 | 24:02 | 14:02 | 35:02 | 04:01 | 08:02 | Bw6                               | 1/2                          | HLA/KIR-Fc/Function                     |
| BC160727A  | 01:01 | 02:01 | 27:05 | 44:03 | 01:02 | 16:01 | Bw4                               | 1/1                          | HLA/KIR-Fc/Function                     |
| BC160727B  | 02:01 | 02:06 | 07:02 | 44:02 | 05:01 | 07:02 | Bw4                               | 1/2                          | HLA/KIR-Fc/Function                     |
| BC170228A  | 02:01 | 03:01 | 40:01 | 51:01 | 03:04 | 14:02 | Bw4                               | 1/1                          | Function                                |
| BC170228B  | 24:02 | 31:01 | 07:02 | 51:01 | 07:02 | 15:02 | Bw4                               | 1/2                          | Function                                |
| BC170302A  | 02:01 | 02:01 | 44:02 | 51:07 | 05:01 | 14:02 | Bw4                               | 1/2                          | Function                                |
| BC170302B  | 02:01 | 24:02 | 40:01 | 51:01 | 03:04 | 04:01 | Bw4                               | 1/2                          | Function                                |
| BC170314A  | 31:01 | 68:01 | 40:01 | 57:01 | 03:04 | 07:01 | Bw4                               | 1/1                          | Function                                |
| BC170314B  | 02:01 | 02:05 | 39:01 | 58:01 | 07:01 | 07:02 | Bw4                               | 1/1                          | Function                                |
| BC170316A  | 03:01 | 11:01 | 07:02 | 35:01 | 04:01 | 07:02 | Bw6                               | 1/2                          | Function                                |
| BC170316B  | 24:02 | 32:01 | 07:02 | 08:01 | 07:01 | 07:02 | Bw4                               | 1/1                          | Function                                |
| BC170330A  | 02:01 | 03:01 | 44:02 | 55:01 | 03:03 | 05:01 | Bw4                               | 1/2                          | KIR-Fc                                  |
| BC170330B  | 01:01 | 68:01 | 07:02 | 51:01 | 07:02 | 14:02 | Bw4                               | 1/1                          | KIR-Fc                                  |
| HC164      | 02:01 | 03:01 | 07:02 | 15:01 | 03:04 | 07:02 | Bw6                               | 1/1                          | HLA/KIR-Fc                              |
| HC169      | 03:01 | 24:02 | 15:22 | 35:03 | 03:03 | 12:03 | Bw4                               | 1/1                          | HLA/KIR-Fc                              |
| HC184      | 02:01 | 02:01 | 35:03 | 40:02 | 02:02 | 12:03 | Bw6                               | 1/2                          | HLA/KIR-Fc                              |
| HC118      | 01:01 | 11:01 | 56:01 | 57:01 | 01:02 | 06:02 | Bw4                               | 1/2                          | HLA                                     |
| HC190      | 02:01 | 24:02 | 13:02 | 27:05 | 02:02 | 06:02 | Bw4                               | 2/2                          | HLA                                     |
| HC198      | 02:01 | 03:01 | 07:02 | 83:01 | 05:01 | 07:02 | Bw6                               | 1/2                          | HLA                                     |
| HC028      | 24:02 | 26:01 | 35:01 | 44:02 | 04:01 | 05:09 | Bw4                               | 2/2                          | HLA/KIR-Fc                              |
| HC101      | 02:01 | 02:01 | 18:01 | 39:01 | 05:01 | 12:03 | Bw6                               | 1/2                          | HLA/KIR-Fc/Function                     |
| HC103      | 03:01 | 03:01 | 07:02 | 35:01 | 04:01 | 07:02 | Bw6                               | 1/2                          | HLA/VIA                                 |
| HC104      | 03:01 | 31:01 | 13:02 | 18:01 | 06:02 | 07:01 | Bw4                               | 1/2                          | VIA                                     |
| HC117      | 32:01 | 68:01 | 38:01 | 44:02 | 12:03 | 16:04 | Bw4                               | 1/1                          | HLA/KIR-Fc/Function                     |
| HC154      | 02:01 | 68:01 | 07:02 | 37:01 | 06:02 | 07:02 | Bw4                               | 1/2                          | HLA/KIR-Fc/Function                     |
| HC110      | 02:01 | 31:01 | 35:02 | 51:01 | 04:01 | 14:02 | Bw4                               | 1/2                          | HLA/KIR-Fc                              |
| HC195      | 01:01 | 02:01 | 18:01 | 57:01 | 06:02 | 07:01 | Bw4                               | 1/2                          | HLA/KIR-Fc                              |
| 422548     | 02:01 | 02:01 | 40:01 | 51:01 | 03:04 | 14:02 | Bw4                               | 1/1                          | HLA/KIR-Fc/Function                     |
| 424429     | 02:01 | 03:01 | 07:02 | 27:05 | 01:02 | 07:02 | Bw4                               | 1/1                          | HLA/KIR-Fc                              |
| 447537     | 02:01 | 03:01 | 07:02 | 07:02 | 07:02 | 07:02 | Bw6                               | 1/1                          | HLA/KIR-Fc/Function                     |
| 811054     | 02:01 | 32:01 | 07:02 | 07:05 | 07:02 | 15:05 | Bw6                               | 1/2                          | HLA/KIR-Fc                              |
| 470384     | 01:01 | 02:01 | 07:05 | 44:02 | 05:01 | 15:05 | Bw4                               | 2/2                          | HLA/KIR-Fc                              |
| 494230     | 01:01 | 80:01 | 08:01 | 15:03 | 02:10 | 07:01 | Bw6                               | 1/2                          | Function                                |
| IGTB0085   |       | 68:01 | 14:01 | 44:03 | 08:02 | 16:01 | Bw4                               | 1/1                          | Function                                |
| IGTB0162   |       | 33:01 | 14:02 | 38:01 | 08:02 | 12:03 | Bw4                               | 1/1                          | Function                                |
| IGTB0225   |       | 68:01 | 27:05 | 57:01 | 02:02 | 06:02 | Bw4                               | 2/2                          | Function                                |
| IGTB0302   | 23:01 | 74:00 | 15:03 | 15:03 | 02:10 | 02:10 | Bw6                               | 2/2                          | Function                                |
| IGTB0330   | 02:01 | 03:01 | 07:02 | 15:01 | 03:04 | 07:02 | Bw6                               | 1/1                          | Function                                |
| IGTB0520   | 11:01 | 26:01 | 08:01 | 15:08 | 03:04 | 07:02 | Bw6                               | 1/1                          | Function                                |
| IGTB0514   |       | 24:02 | 08:01 | 44:03 | 07:01 | 16:01 | Bw4                               | 1/1                          | Function                                |
| IGTB0741   |       | 24:02 | 13:01 | 39:06 | 03:04 | 07:02 | Bw4                               | 1/1                          | Function                                |
| IGTB0848   |       | 23:01 | 35:03 | 49:01 | 03:02 | 07:01 | Bw4                               | 1/1                          | Function                                |
| IGTB0884   |       | 24:02 | 15:01 | 51:01 | 03:04 | 15:09 | Bw4                               | 1/2                          | Function                                |
| 120508     | 02:07 | 30:01 | 13:02 | 40:01 | 06:02 | 15:02 | Bw4                               | 2/2                          | HLA/KIR-Fc/Function                     |
| 339477     | 02:01 | 11:01 | 14:01 | 27:02 | 02:02 | 08:02 | Bw4                               | 1/2                          | Function                                |
| 902192     | 02:05 | 68:02 | 14:02 | 50:01 | 06:02 | 08:02 | Bw6                               | 1/2                          | Function                                |
| 820666     | 02:01 | 11:01 | 15:03 | 44:02 | 05:01 | 16:01 | Bw4                               | 1/2                          | Function                                |
| 963465     | 03:01 | 24:02 | 15:03 | 44:02 | 02:10 | 05:01 | Bw4                               | 2/2                          | Function                                |
| 814129     | 11:01 | 11:02 | 15:12 | 51:01 | 03:03 | 14:02 | Bw4                               | 1/1                          | Function                                |
| 736511     | 02:01 | 03:01 | 18:01 | 35:03 | 04:01 | 05:01 | Bw6                               | 2/2                          | HLA/KIR-Fc                              |
| 160961     | 03:01 | 03:01 | 18:01 | 18:01 | 05:01 | 12:03 | Bw6                               | 1/2                          | HLA/KIR-Fc                              |
| 773092     | 11:01 | 25:01 | 18:01 | 35:01 | 04:01 | 07:01 | Bw6                               | 1/2                          | Function                                |
| 427341     | 02:01 | 03:01 | 35:01 | 44:02 | 04:01 | 05:01 | Bw4                               | 2/2                          | HLA/KIR-Fc                              |
| 457386     | 26:01 | 31:01 | 35:01 | 38:01 | 04:01 | 12:03 | Bw4                               | 1/2                          | Function                                |

|        |       |       |       |       |       |       |            |     |                     |
|--------|-------|-------|-------|-------|-------|-------|------------|-----|---------------------|
| 991589 | 02:01 | 31:01 | 35:02 | 44:02 | 04:01 | 05:01 | <i>Bw4</i> | 2/2 | HLA/KIR-Fc          |
| 522458 | 03:01 | 69:01 | 38:01 | 55:01 | 01:02 | 12:03 | <i>Bw4</i> | 1/1 | Function            |
| 334026 | 02:01 | 32:01 | 40:01 | 44:03 | 03:04 | 16:01 | <i>Bw4</i> | 1/1 | HLA/KIR-Fc          |
| 290892 | 11:01 | 11:02 | 40:01 | 46:01 | 01:02 | 07:02 | <i>Bw6</i> | 1/1 | HLA/KIR-Fc          |
| 205460 | 01:01 | 03:01 | 44:02 | 52:01 | 05:01 | 12:02 | <i>Bw4</i> | 1/2 | HLA/KIR-Fc/Function |
| 453548 | 02:01 | 03:01 | 44:02 | 51:01 | 05:01 | 15:02 | <i>Bw4</i> | 2/2 | Function            |
| 305415 | 02:01 | 11:01 | 44:03 | 51:01 | 07:01 | 14:02 | <i>Bw4</i> | 1/1 | HLA/KIR-Fc/Function |
| 471607 | 02:01 | 11:01 | 44:02 | 57:01 | 05:01 | 06:02 | <i>Bw4</i> | 2/2 | HLA/KIR-Fc          |
| 653425 | 01:01 | 30:01 | 51:01 | 57:01 | 06:02 | 14:02 | <i>Bw4</i> | 1/2 | Function            |

- a) *Bw4*: Carrier of at least one HLA-B molecule with *Bw4* motif; *Bw6*: Lack of *Bw4* motif in both HLA-B molecules.  
b) Haplotype based on HLA-C group of the two HLA-C alleles.  
c) HLA: HLA-C expression levels; KIR-Fc: Assessment of KIR binding; Function: Assessment of NK-cell function and NK-cell-mediated inhibition of HIV-1 replication after exposure to 721.221 cells or HIV-infected CD4<sup>+</sup> T cells.

**Table S2. Antibodies and flow cytometry specifications. Related to STAR Methods.**

| Antibody                    | Clone  | Conjugate <sup>a</sup> | Vendor          | Laser excitation (nm) <sup>b</sup> | Filter (LP, BP) <sup>c</sup> | Experiments <sup>d</sup> |
|-----------------------------|--------|------------------------|-----------------|------------------------------------|------------------------------|--------------------------|
| α-human CD3                 | UCHT1  | BV510                  | Biologend       | 405                                | 505, 525/50                  | HLA/KIR-Fc               |
| α-human CD3                 | UCHT1  | PE-Cf594               | BD Bioscience   | 561                                | 600, 610/20                  | Sorting/Function         |
| α-human CD3                 | UCHT1  | PerCP-Cy5.5            | Biologend       | 561                                | 685, 710/40                  | Function                 |
| α-human CD4                 | RPA-T4 | APC                    | BD Bioscience   | 640                                | 670/30                       | HLA/KIR-Fc               |
| α-human CD16                | EG8    | BV785                  | Biologend       | 405                                | 750, 780/60                  | Purity/Sorting/Function  |
| α-human CD56                | HCD56  | BUV395                 | BD Bioscience   | 355                                | 379/28                       | Purity/Sorting/Function  |
| α-human CD8                 | HIT8a  | FITC                   | BD Bioscience   | 488                                | 505,525/50                   | Purity                   |
| α-human CD14                | HCD14  | APC-Cy7                | Biologend       | 640                                | 750, 780/60                  | Sorting/Function         |
| α-human CD14                | HCD14  | PerCP-Cy5.5            | Biologend       | 640                                | 685, 710/40                  | Function                 |
| α-human CD19                | HIB19  | APC-Cy7                | Biologend       | 640                                | 750, 780/60                  | Sorting/Function         |
| α-human CD19                | HIB19  | PerCP-Cy5.5            | Biologend       | 640                                | 685, 710/40                  | Function                 |
| α-human KIR2DL1/S5          | 143211 | FITC                   | R&D Systems     | 488                                | 505,525/50                   | Sorting/Function         |
| α-human KIR2DL1/S5          | 143211 | -                      | R&D Systems     | -                                  | -                            | Blocking                 |
| α-human KIR2DL3             | 180701 | APC                    | R&D Systems     | 633                                | 670/30                       | Sorting/Function         |
| α-human KIR2DL3             | 180701 | -                      | R&D Systems     | -                                  | -                            | Blocking                 |
| α-human KIR2DL2/3/S2        | DX27   | PE                     | Biologend       | 561                                | 582/15                       | Function                 |
| α-human KIR3DL1             | DX9    | AF700                  | Biologend       | 633                                | 685, 730/45                  | Function                 |
| α-human NKG2A               | Z199   | PE-Cy7                 | BeckmanCoulter  | 561                                | 750, 780/60                  | Function                 |
| α-human CD107a              | H4A3   | BV421                  | Biologend       | 405                                | 450/50                       | Function                 |
| α-human CD107a              | H4A3   | BV510                  | Biologend       | 405                                | 505, 525/50                  | Function                 |
| α-human TNF-α               | MAB11  | BV650                  | Biologend       | 405                                | 635, 675/50                  | Function                 |
| α-human HLA-C               | DT9    | -                      | Merck-Millipore | -                                  | 582/15                       | HLA                      |
| α-mouse IgG                 | poly   | PE                     | Sigma           | 561                                | 582/15                       | HLA                      |
| KIR2DL1-IgG <sub>1</sub>    | -      | -                      | R&D Systems     | -                                  | -                            | KIR-Fc                   |
| KIR2DL3-IgG <sub>1</sub>    | -      | -                      | R&D Systems     | -                                  | -                            | KIR-Fc                   |
| α-human IgG                 | poly   | R-PE                   | Invitrogen      | 561                                | 582/15                       | KIR-Fc                   |
| α-HIV-1 core antigen        | KC57   | FITC                   | BeckmanCoulter  | 488                                | 505,525/50                   | HLA/KIR-Fc               |
| α-human CD45RO              | UCHL1  | -                      | Biologend       | -                                  | -                            | Function                 |
| LIVE/DEAD Blue <sup>e</sup> | -      | -                      | Invitrogen      | 355                                | 410, 450/50                  | All experiments          |

a) BV: Brilliant Violet; BUV: Brilliant Ultraviolet; APC: Allophycocyanin; FITC: Fluorescein isothiocyanate; PE: Phycoerythrin; AF: AlexaFluor

b) Laser power, LSR Fortessa/Sorp ARIA II: 355nm: 60mW/100mW; 405nm: 100mW; 488nm: 50mW/200mW; 561nm: 50mW/150mW; 640nm: 40mW/140mW

c) LP = long pass filter, BP = band pass filter.

d) HLA: HLA-C Expression levels; KIR-Fc: Assessment of KIR binding; Function: Assessment of NK-cell function and NK-cell-mediated inhibition of HIV-1 replication after exposure to 721.221 cells or HIV-infected CD4<sup>+</sup> T cells.

e) Amine-reactive dye
